# Supplementary material for: Dynamics of the gut microbiota in developmental stages of Litopenaeus vannamei reveal its association with body weight
Source: PubMed Central journal article supplement (PMC6345827; doi:10.1038/s41598-018-37042-3), 2019-01-24
Supplement: 41598_2018_37042_MOESM1_ESM.pdf [file 41598_2018_37042_MOESM1_ESM.pdf]

1 **Title: Dynamics of the gut microbiota in developmental stages of *Litopenaeus***  
2 ***vannamei* reveal its association with body weight**

3 **Running title: Gut microbiota in developmental stages of *Litopenaeus vannamei***

4

5

6 Jiqiang Fan<sup>1#</sup>, Limei Chen<sup>1#</sup>, Guoqin Mai<sup>1</sup>, Haoran Zhang<sup>1</sup>, Jinfang Yang<sup>3</sup>, Deng

7 Deng<sup>3</sup>, Yingfei Ma<sup>1,2\*</sup>

8 <sup>1</sup> Institute of Synthetic Biology, Shenzhen Institutes of Advanced Technology,

9 Chinese Academy of Sciences, Shenzhen, 518000 China.

10 <sup>2</sup> Shenzhen Key Laboratory of Synthetic Genomics and Center for Synthetic

11 Genomics, Shenzhen Institutes of Advanced Technology, Chinese Academy of

12 Sciences, Shenzhen 518055, China

13 <sup>3</sup> R&D Center, Shenzhen Alpha Feed Co., Ltd, Shenzhen, 518000, China.

14 \*Corresponding to Yingfei Ma, [yingfei.ma@siat.ac.cn](mailto:yingfei.ma@siat.ac.cn)

15 # These authors equally contribute to the study

16

17

18

19

20

21

22

24 **Table S1 Primers and barcodes used in this study**

| #SampleID   | BarcodeSequence | LinkerPrimerSequence | Body length | Body weight |
|-------------|-----------------|----------------------|-------------|-------------|
| SGP01N001W1 | TCCCTTGTCTCC    | GGACTACHVGGGTWTCTAAT | 4.5         |             |
| SGP01N002W1 | ACGAGACTGATT    | GGACTACHVGGGTWTCTAAT | 4.4         |             |
| SGP01N003W1 | GCTGTACGGATT    | GGACTACHVGGGTWTCTAAT | 3.8         |             |
| SGP05N004W1 | ATCACCAGGTGT    | GGACTACHVGGGTWTCTAAT | 5.9         |             |
| SGP05N005W1 | TGGTCAACGATA    | GGACTACHVGGGTWTCTAAT | 4.2         |             |
| SGP05N006W1 | ATCGCACAGTAA    | GGACTACHVGGGTWTCTAAT | 4.2         |             |
| SGP08N007W1 | GTCGTGTAGCCT    | GGACTACHVGGGTWTCTAAT | 5           |             |
| SGP08N008W1 | AGCGGAGGTTAG    | GGACTACHVGGGTWTCTAAT | 4.6         |             |
| SGP08N009W1 | ATCCTTTGGTTC    | GGACTACHVGGGTWTCTAAT | 3.6         |             |
| SGP03K001W1 | TACAGCGCATAAC   | GGACTACHVGGGTWTCTAAT | 4.9         |             |
| SGP03K002W1 | AATTGTGTCGGA    | GGACTACHVGGGTWTCTAAT | 4.4         |             |
| SGP03K003W1 | TGCATAACTGG     | GGACTACHVGGGTWTCTAAT | 4.4         |             |
| SGP06K004W1 | AGTCGAACGAGG    | GGACTACHVGGGTWTCTAAT | 4.4         |             |
| SGP06K005W1 | ACCAGTGACTCA    | GGACTACHVGGGTWTCTAAT | 5.5         |             |
| SGP06K006W1 | GAATACCAAGTC    | GGACTACHVGGGTWTCTAAT | 3.9         |             |
| SGP10K007W1 | GTAGATCGTGTA    | GGACTACHVGGGTWTCTAAT | 4.5         |             |
| SGP10K008W1 | TAACGTGTGTGC    | GGACTACHVGGGTWTCTAAT | 3.6         |             |
| SGP10K009W1 | CATTATGGCGTG    | GGACTACHVGGGTWTCTAAT | 4.7         |             |
| SGP01N010W2 | CCAATACGCTG     | GGACTACHVGGGTWTCTAAT | 6.8         |             |
| SGP01N011W2 | GATCTGCGATCC    | GGACTACHVGGGTWTCTAAT | 6.5         |             |
| SGP01N012W2 | CAGCTCATCAGC    | GGACTACHVGGGTWTCTAAT | 5.5         |             |
| SGP05N013W2 | CAAACAACAGCT    | GGACTACHVGGGTWTCTAAT | 6.1         |             |
| SGP05N014W2 | GCAACACCATCC    | GGACTACHVGGGTWTCTAAT | 6.5         |             |
| SGP05N015W2 | GCGATATATCGC    | GGACTACHVGGGTWTCTAAT | 5.6         |             |
| SGP08N016W2 | CGAGCAATCCTA    | GGACTACHVGGGTWTCTAAT | 6.3         |             |
| SGP08N017W2 | AGTCGTGCACAT    | GGACTACHVGGGTWTCTAAT | 5.3         |             |
| SGP08N018W2 | GTATCTGCGCGT    | GGACTACHVGGGTWTCTAAT | 5.6         |             |
| SGP03K010W2 | CGAGGGAAAGTC    | GGACTACHVGGGTWTCTAAT | 5.6         |             |
| SGP03K011W2 | CAAATTCGGGAT    | GGACTACHVGGGTWTCTAAT | 6.5         |             |
| SGP03K012W2 | AGATTGACCAAC    | GGACTACHVGGGTWTCTAAT | 6.2         |             |
| SGP06K013W2 | AGTTACGAGCTA    | GGACTACHVGGGTWTCTAAT | 6.2         |             |
| SGP06K014W2 | GCATATGCACTG    | GGACTACHVGGGTWTCTAAT | 6.5         |             |
| SGP06K015W2 | CAACTCCCCTGA    | GGACTACHVGGGTWTCTAAT | 5.9         |             |
| SGP10K016W2 | TTGCGTTAGCAG    | GGACTACHVGGGTWTCTAAT | 5.5         |             |
| SGP10K017W2 | TACGAGCCCTAA    | GGACTACHVGGGTWTCTAAT | 5.6         |             |
| SGP10K018W2 | CACTACGCTAGA    | GGACTACHVGGGTWTCTAAT | 5.5         |             |
| SGP03S001W2 | TGCAGTCCTCGA    | GGACTACHVGGGTWTCTAAT | 4.1         |             |
| SGP03S002W2 | ACCATAGCTCCG    | GGACTACHVGGGTWTCTAAT | 4.4         |             |
| SGP03S003W2 | TCGACATCTCTT    | GGACTACHVGGGTWTCTAAT | 6.2         |             |

|             |               |                      |     |
|-------------|---------------|----------------------|-----|
| SGP06S004W2 | GAACACTTTGGA  | GGACTACHVGGGTWTCTAAT | 4.5 |
| SGP06S005W2 | GAGCCATCTGTA  | GGACTACHVGGGTWTCTAAT | 4.5 |
| SGP06S006W2 | TTGGGTACACGT  | GGACTACHVGGGTWTCTAAT | 4.5 |
| SGP10S007W2 | AAGGCGCTCCTT  | GGACTACHVGGGTWTCTAAT | 4.5 |
| SGP10S008W2 | TAATACGGATCG  | GGACTACHVGGGTWTCTAAT | 4.5 |
| SGP10S009W2 | TCGGAATTAGAC  | GGACTACHVGGGTWTCTAAT | 4   |
| SGP01N019W3 | TGTGAATTCGGA  | GGACTACHVGGGTWTCTAAT | 7.7 |
| SGP01N020W3 | CATTCGTGGCGT  | GGACTACHVGGGTWTCTAAT | 6.4 |
| SGP01N021W3 | TACTACGTGGCC  | GGACTACHVGGGTWTCTAAT | 6.8 |
| SGP05N022W3 | GGCCAGTTCCTA  | GGACTACHVGGGTWTCTAAT | 6.5 |
| SGP05N023W3 | GATGTTTCGCTAG | GGACTACHVGGGTWTCTAAT | 6.1 |
| SGP05N024W3 | CTATCTCCTGTC  | GGACTACHVGGGTWTCTAAT | 6.5 |
| SGP08N025W3 | ACTCACAGGAAT  | GGACTACHVGGGTWTCTAAT | 6.8 |
| SGP08N026W3 | ATGATGAGCCTC  | GGACTACHVGGGTWTCTAAT | 6.7 |
| SGP08N027W3 | GTCGACAGAGGA  | GGACTACHVGGGTWTCTAAT | 6.1 |
| SGP03K019W3 | TGTCGCAAATAG  | GGACTACHVGGGTWTCTAAT | 6.5 |
| SGP03K020W3 | CATCCCTCTACT  | GGACTACHVGGGTWTCTAAT | 6.5 |
| SGP03K021W3 | TATACCGCTGCG  | GGACTACHVGGGTWTCTAAT | 5.5 |
| SGP06K022W3 | AGTTGAGGCATT  | GGACTACHVGGGTWTCTAAT | 5.6 |
| SGP06K023W3 | ACAATAGACACC  | GGACTACHVGGGTWTCTAAT | 6.8 |
| SGP06K024W3 | CGGTCAATTGAC  | GGACTACHVGGGTWTCTAAT | 6.7 |
| SGP10K025W3 | GTGGAGTCTCAT  | GGACTACHVGGGTWTCTAAT | 6.2 |
| SGP10K026W3 | GCTCGAAGATTC  | GGACTACHVGGGTWTCTAAT | 6.5 |
| SGP10K027W3 | AGGCTTACGTGT  | GGACTACHVGGGTWTCTAAT | 6.7 |
| SGP03S010W3 | TCTCTACCACTC  | GGACTACHVGGGTWTCTAAT | 4.1 |
| SGP03S011W3 | ACTTCCA ACTTC | GGACTACHVGGGTWTCTAAT | 4.4 |
| SGP03S012W3 | CTCACCTAGGAA  | GGACTACHVGGGTWTCTAAT | 3.5 |
| SGP06S013W3 | GTGTTGTCGTGC  | GGACTACHVGGGTWTCTAAT | 4   |
| SGP06S014W3 | CCACAGATCGAT  | GGACTACHVGGGTWTCTAAT | 4.3 |
| SGP06S015W3 | TATCGACACAAG  | GGACTACHVGGGTWTCTAAT | 4   |
| SGP10S016W3 | GATTCCGGCTCA  | GGACTACHVGGGTWTCTAAT | 4.5 |
| SGP10S017W3 | CGTAATTGCCGC  | GGACTACHVGGGTWTCTAAT | 4   |
| SGP10S018W3 | GGTGACTAGTTC  | GGACTACHVGGGTWTCTAAT | 4.1 |
| SGP01N028W4 | ATGGGTTCCGTC  | GGACTACHVGGGTWTCTAAT | 6.5 |
| SGP01N029W4 | TAGGCATGCTTG  | GGACTACHVGGGTWTCTAAT | 7.1 |
| SGP01N030W4 | AACTAGTTCAGG  | GGACTACHVGGGTWTCTAAT | 7.9 |
| SGP05N031W4 | ATTCTGCCGAAG  | GGACTACHVGGGTWTCTAAT | 5.6 |
| SGP05N032W4 | AGCATGTCCCGT  | GGACTACHVGGGTWTCTAAT | 7.3 |
| SGP05N033W4 | GTACGATATGAC  | GGACTACHVGGGTWTCTAAT | 6.6 |
| SGP08N034W4 | GTGGTGGTTTCC  | GGACTACHVGGGTWTCTAAT | 5.6 |
| SGP08N035W4 | TAGTATGCGCAA  | GGACTACHVGGGTWTCTAAT | 6   |
| SGP08N036W4 | TGCGCTGAATGT  | GGACTACHVGGGTWTCTAAT | 6.4 |
| SGP03K028W4 | ATGGCTGTCAGT  | GGACTACHVGGGTWTCTAAT | 6.7 |
| SGP03K029W4 | GTTCTCTTCTCG  | GGACTACHVGGGTWTCTAAT | 6.8 |

|             |               |                      |     |
|-------------|---------------|----------------------|-----|
| SGP03K030W4 | CGTAAGATGCCT  | GGACTACHVGGGTWTCTAAT | 6.6 |
| SGP06K031W4 | GCGTTCTAGCTG  | GGACTACHVGGGTWTCTAAT | 7.2 |
| SGP06K032W4 | GTTGTTCTGGGA  | GGACTACHVGGGTWTCTAAT | 6.5 |
| SGP06K033W4 | GGACTTCCAGCT  | GGACTACHVGGGTWTCTAAT | 7.3 |
| SGP10K034W4 | CTCACAACCGTG  | GGACTACHVGGGTWTCTAAT | 7   |
| SGP10K035W4 | CTGCTATTCCTC  | GGACTACHVGGGTWTCTAAT | 6.6 |
| SGP10K036W4 | ATGTCACCGCTG  | GGACTACHVGGGTWTCTAAT | 7   |
| SGP03S019W4 | TGTAACGCCGAT  | GGACTACHVGGGTWTCTAAT | 4.9 |
| SGP03S020W4 | AGCAGAACATCT  | GGACTACHVGGGTWTCTAAT | 4.4 |
| SGP03S021W4 | TGGAGTAGGTGG  | GGACTACHVGGGTWTCTAAT | 3.6 |
| SGP06S022W4 | TTGGCTCTATTC  | GGACTACHVGGGTWTCTAAT | 4.5 |
| SGP06S023W4 | GATCCCACGTAC  | GGACTACHVGGGTWTCTAAT | 5.2 |
| SGP06S024W4 | TACCGCTTCTTC  | GGACTACHVGGGTWTCTAAT | 4.8 |
| SGP10S025W4 | TGTGCGATAACA  | GGACTACHVGGGTWTCTAAT | 4.4 |
| SGP10S026W4 | GATTATCGACGA  | GGACTACHVGGGTWTCTAAT | 4.4 |
| SGP10S027W4 | GCCTAGCCCAAT  | GGACTACHVGGGTWTCTAAT | 4.3 |
| SGP01N037W5 | GATGTATGTGGT  | GGACTACHVGGGTWTCTAAT | 8.1 |
| SGP01N038W5 | TCCCTTGTCTCC  | GGACTACHVGGGTWTCTAAT | 7.7 |
| SGP01N039W5 | ACGAGACTGATT  | GGACTACHVGGGTWTCTAAT | 7.4 |
| SGP05N040W5 | GCTGTACGGATT  | GGACTACHVGGGTWTCTAAT | 6.5 |
| SGP05N041W5 | ATCACCAGGTGT  | GGACTACHVGGGTWTCTAAT | 7.7 |
| SGP05N042W5 | TGGTCAACGATA  | GGACTACHVGGGTWTCTAAT | 7.1 |
| SGP08N043W5 | ATCGCACAGTAA  | GGACTACHVGGGTWTCTAAT | 6.4 |
| SGP08N044W5 | GTCGTGTAGCCT  | GGACTACHVGGGTWTCTAAT | 6.7 |
| SGP08N045W5 | AGCGGAGGTTAG  | GGACTACHVGGGTWTCTAAT | 7   |
| SGP03K037W5 | ATCCTTTGGTTC  | GGACTACHVGGGTWTCTAAT | 7   |
| SGP03K038W5 | TACAGCGCATAAC | GGACTACHVGGGTWTCTAAT | 8.1 |
| SGP03K039W5 | AATTGTGTCGGA  | GGACTACHVGGGTWTCTAAT | 7.1 |
| SGP06K040W5 | TGCATACACTGG  | GGACTACHVGGGTWTCTAAT | 7   |
| SGP06K041W5 | AGTCGAACGAGG  | GGACTACHVGGGTWTCTAAT | 7.6 |
| SGP06K042W5 | ACCAGTACTCA   | GGACTACHVGGGTWTCTAAT | 7.6 |
| SGP10K043W5 | GAATACCAAGTC  | GGACTACHVGGGTWTCTAAT | 7.2 |
| SGP10K044W5 | GTAGATCGTGTA  | GGACTACHVGGGTWTCTAAT | 7.8 |
| SGP10K045W5 | TAACGTGTGTGC  | GGACTACHVGGGTWTCTAAT | 7.4 |
| SGP03S028W5 | CATTATGGCGTG  | GGACTACHVGGGTWTCTAAT | 4.5 |
| SGP03S029W5 | CCAATACGCCTG  | GGACTACHVGGGTWTCTAAT | 3.7 |
| SGP03S030W5 | GATCTGCGATCC  | GGACTACHVGGGTWTCTAAT | 4.5 |
| SGP06S031W5 | CAGCTCATCAGC  | GGACTACHVGGGTWTCTAAT | 4   |
| SGP06S032W5 | CAAACAACAGCT  | GGACTACHVGGGTWTCTAAT | 5.1 |
| SGP06S033W5 | GCAACACCATCC  | GGACTACHVGGGTWTCTAAT | 4.2 |
| SGP10S034W5 | GCGATATATCGC  | GGACTACHVGGGTWTCTAAT | 4.5 |
| SGP10S035W5 | CGAGCAATCCTA  | GGACTACHVGGGTWTCTAAT | 5.1 |
| SGP10S036W5 | AGTCGTGCACAT  | GGACTACHVGGGTWTCTAAT | 4.9 |
| SGP01N046W6 | GTATCTGCGCGT  | GGACTACHVGGGTWTCTAAT | 6.8 |

|             |               |                      |     |
|-------------|---------------|----------------------|-----|
| SGP01N047W6 | CGAGGGAAAGTC  | GGACTACHVGGGTWTCTAAT | 7.1 |
| SGP01N048W6 | CAAATTCGGGAT  | GGACTACHVGGGTWTCTAAT | 7.1 |
| SGP05N049W6 | AGATTGACCAAC  | GGACTACHVGGGTWTCTAAT | 7.2 |
| SGP05N050W6 | AGTTACGAGCTA  | GGACTACHVGGGTWTCTAAT | 7.2 |
| SGP05N051W6 | GCATATGCACTG  | GGACTACHVGGGTWTCTAAT | 7.2 |
| SGP08N052W6 | CAACTCCCCTGA  | GGACTACHVGGGTWTCTAAT | 7.4 |
| SGP08N053W6 | TTGCGTTAGCAG  | GGACTACHVGGGTWTCTAAT | 7.5 |
| SGP08N054W6 | TACGAGCCCTAA  | GGACTACHVGGGTWTCTAAT | 7.9 |
| SGP03K046W6 | CACTACGCTAGA  | GGACTACHVGGGTWTCTAAT | 8   |
| SGP03K047W6 | TGCAGTCCTCGA  | GGACTACHVGGGTWTCTAAT | 7.6 |
| SGP03K048W6 | ACCATAGCTCCG  | GGACTACHVGGGTWTCTAAT | 8.1 |
| SGP06K049W6 | TCGACATCTCTT  | GGACTACHVGGGTWTCTAAT | 7.9 |
| SGP06K050W6 | GAACACTTTGGA  | GGACTACHVGGGTWTCTAAT | 7.6 |
| SGP06K051W6 | GAGCCATCTGTA  | GGACTACHVGGGTWTCTAAT | 7.7 |
| SGP10K052W6 | TTGGGTACACGT  | GGACTACHVGGGTWTCTAAT | 8.6 |
| SGP10K053W6 | AAGGCGCTCCTT  | GGACTACHVGGGTWTCTAAT | 7.4 |
| SGP10K054W6 | TAATACGGATCG  | GGACTACHVGGGTWTCTAAT | 8.1 |
| SGP03S037W6 | TCGGAATTAGAC  | GGACTACHVGGGTWTCTAAT | 5.5 |
| SGP03S038W6 | TGTGAATTCGGA  | GGACTACHVGGGTWTCTAAT | 5.5 |
| SGP03S039W6 | CATTCGTGGCGT  | GGACTACHVGGGTWTCTAAT | 4.4 |
| SGP06S040W6 | TACTACGTGGCC  | GGACTACHVGGGTWTCTAAT | 4.6 |
| SGP06S041W6 | GGCCAGTTCCTA  | GGACTACHVGGGTWTCTAAT | 4.5 |
| SGP06S042W6 | GATGTTTCGCTAG | GGACTACHVGGGTWTCTAAT | 4.6 |
| SGP10S043W6 | CTATCTCCTGTC  | GGACTACHVGGGTWTCTAAT | 4.8 |
| SGP10S044W6 | ACTCACAGGAAT  | GGACTACHVGGGTWTCTAAT | 5.4 |
| SGP10S045W6 | ATGATGAGCCTC  | GGACTACHVGGGTWTCTAAT | 4.7 |
| SGP01N055W7 | GTCGACAGAGGA  | GGACTACHVGGGTWTCTAAT | 6.7 |
| SGP01N056W7 | TGTCGCAAATAG  | GGACTACHVGGGTWTCTAAT | 6.8 |
| SGP01N057W7 | CATCCCTCTACT  | GGACTACHVGGGTWTCTAAT | 8.4 |
| SGP05N058W7 | TATACCGCTGCG  | GGACTACHVGGGTWTCTAAT | 7.3 |
| SGP05N059W7 | AGTTGAGGCATT  | GGACTACHVGGGTWTCTAAT | 8.1 |
| SGP05N060W7 | ACAATAGACACC  | GGACTACHVGGGTWTCTAAT | 8.1 |
| SGP08N061W7 | CGGTCAATTGAC  | GGACTACHVGGGTWTCTAAT | 8.9 |
| SGP08N062W7 | GTGGAGTCTCAT  | GGACTACHVGGGTWTCTAAT | 7.2 |
| SGP08N063W7 | GCTCGAAGATTC  | GGACTACHVGGGTWTCTAAT | 7.3 |
| SGP03K055W7 | AGGCTTACGTGT  | GGACTACHVGGGTWTCTAAT | 7.1 |
| SGP03K056W7 | TCTCTACCACTC  | GGACTACHVGGGTWTCTAAT | 8.1 |
| SGP03K057W7 | ACTTCCAACTTC  | GGACTACHVGGGTWTCTAAT | 8   |
| SGP06K058W7 | CTCACCTAGGAA  | GGACTACHVGGGTWTCTAAT | 7.7 |
| SGP06K059W7 | GTGTTGTCGTGC  | GGACTACHVGGGTWTCTAAT | 8   |
| SGP06K060W7 | CCACAGATCGAT  | GGACTACHVGGGTWTCTAAT | 8.5 |
| SGP10K061W7 | TATCGACACAAG  | GGACTACHVGGGTWTCTAAT | 8.3 |
| SGP10K062W7 | GATTCCGGCTCA  | GGACTACHVGGGTWTCTAAT | 7.6 |
| SGP10K063W7 | CGTAATTGCCGC  | GGACTACHVGGGTWTCTAAT | 8.5 |

|             |              |                      |     |
|-------------|--------------|----------------------|-----|
| SGP03S046W7 | GGTGACTAGTTC | GGACTACHVGGGTWTCTAAT | 4.8 |
| SGP03S047W7 | ATGGGTTCGTC  | GGACTACHVGGGTWTCTAAT | 4.9 |
| SGP03S048W7 | TAGGCATGCTTG | GGACTACHVGGGTWTCTAAT | 4.8 |
| SGP06S049W7 | AACTAGTTCAGG | GGACTACHVGGGTWTCTAAT | 5.5 |
| SGP06S050W7 | ATTCTGCCGAAG | GGACTACHVGGGTWTCTAAT | 4.4 |
| SGP06S051W7 | AGCATGTCCCGT | GGACTACHVGGGTWTCTAAT | 4.7 |
| SGP10S052W7 | GTACGATATGAC | GGACTACHVGGGTWTCTAAT | 4.4 |
| SGP10S053W7 | GTGGTGGTTTCC | GGACTACHVGGGTWTCTAAT | 4.8 |
| SGP10S054W7 | TAGTATGCGCAA | GGACTACHVGGGTWTCTAAT | 4.5 |
| SGP01N064W8 | TGCGCTGAATGT | GGACTACHVGGGTWTCTAAT | 8.6 |
| SGP01N065W8 | ATGGCTGTCAGT | GGACTACHVGGGTWTCTAAT | 7.5 |
| SGP01N066W8 | GTTCTCTTCTCG | GGACTACHVGGGTWTCTAAT | 7.2 |
| SGP05N067W8 | CGTAAGATGCCT | GGACTACHVGGGTWTCTAAT | 7.4 |
| SGP05N068W8 | GCGTTCTAGCTG | GGACTACHVGGGTWTCTAAT | 8.6 |
| SGP05N069W8 | GTTGTTCTGGGA | GGACTACHVGGGTWTCTAAT | 8.1 |
| SGP08N070W8 | GGACTCCAGCT  | GGACTACHVGGGTWTCTAAT | 7.9 |
| SGP08N071W8 | CTCACAACCGTG | GGACTACHVGGGTWTCTAAT | 9.2 |
| SGP08N072W8 | CTGCTATTCCTC | GGACTACHVGGGTWTCTAAT | 7.5 |
| SGP03K064W8 | ATGTCACCGCTG | GGACTACHVGGGTWTCTAAT | 8.7 |
| SGP03K065W8 | TGTAACGCCGAT | GGACTACHVGGGTWTCTAAT | 8.9 |
| SGP03K066W8 | AGCAGAACATCT | GGACTACHVGGGTWTCTAAT | 8   |
| SGP06K067W8 | TGGAGTAGGTGG | GGACTACHVGGGTWTCTAAT | 7.5 |
| SGP06K068W8 | TTGGCTCTATTC | GGACTACHVGGGTWTCTAAT | 8.9 |
| SGP06K069W8 | GATCCCACGTAC | GGACTACHVGGGTWTCTAAT | 8.3 |
| SGP10K070W8 | TACCGCTTCTTC | GGACTACHVGGGTWTCTAAT | 6.2 |
| SGP10K071W8 | TGTGCGATAACA | GGACTACHVGGGTWTCTAAT | 7.6 |
| SGP10K072W8 | GATTATCGACGA | GGACTACHVGGGTWTCTAAT | 8   |
| SGP03S055W8 | GCCTAGCCCAAT | GGACTACHVGGGTWTCTAAT | 4.7 |
| SGP03S056W8 | GATGTATGTGGT | GGACTACHVGGGTWTCTAAT | 4.3 |
| SGP03S057W8 | TCCCTTGCTCC  | GGACTACHVGGGTWTCTAAT | 5.4 |
| SGP06S058W8 | ACGAGACTGATT | GGACTACHVGGGTWTCTAAT | 4.7 |
| SGP06S059W8 | GCTGTACGGATT | GGACTACHVGGGTWTCTAAT | 4.8 |
| SGP06S060W8 | ATCACCAGGTGT | GGACTACHVGGGTWTCTAAT | 3.1 |
| SGP10S061W8 | TGGTCAACGATA | GGACTACHVGGGTWTCTAAT | 4.6 |
| SGP10S062W8 | ATCGCACAGTAA | GGACTACHVGGGTWTCTAAT | 4.2 |
| SGP10S063W8 | GTCGTGTAGCCT | GGACTACHVGGGTWTCTAAT | 4.6 |

25 **Table S3. Fifty-eight OTUs consisted of OTU-level phylogenetic core in shrimp gut**

26 **microbiota**

| OTU ID  | Phylum     | Genus                 | Proportion in total sequences (%) |
|---------|------------|-----------------------|-----------------------------------|
| OTU144  | Firmicutes | unclassified_Bacteria | 19.49                             |
| OTU1178 | Firmicutes | unclassified_Bacteria | 2.32                              |

---

|         |                |                                  |       |
|---------|----------------|----------------------------------|-------|
| OTU1197 | Firmicutes     | unclassified_Firmicutes          | 2.20  |
| OTU1165 | Firmicutes     | Allobaculum                      | 1.59  |
| OTU699  | Firmicutes     | unclassified_Bacteria            | 0.45  |
| OTU577  | Firmicutes     | Lactobacillus                    | 0.35  |
| OTU1150 | Firmicutes     | Lactobacillus                    | 0.28  |
| OTU117  | Firmicutes     | unclassified_Lachnospiraceae     | 0.12  |
| OTU400  | Proteobacteria | unclassified_Vibrionaceae        | 15.73 |
| OTU1171 | Proteobacteria | Vibrio                           | 3.87  |
| OTU520  | Proteobacteria | unclassified_Rhodobacteraceae    | 1.46  |
| OTU1164 | Proteobacteria | unclassified_Rhodobacteraceae    | 1.26  |
| OTU1220 | Proteobacteria | Vibrio                           | 1.20  |
| OTU1156 | Proteobacteria | Escherichia/Shigella             | 1.07  |
| OTU1166 | Proteobacteria | Pseudoalteromonas                | 0.96  |
| OTU369  | Proteobacteria | unclassified_Rhodobacteraceae    | 0.86  |
| OTU1198 | Proteobacteria | unclassified_Rhodobacteraceae    | 0.85  |
| OTU1184 | Proteobacteria | unclassified_Rhodobacteraceae    | 0.76  |
| OTU1172 | Proteobacteria | Pelagicola                       | 0.74  |
| OTU1155 | Proteobacteria | unclassified_Rhodobacteraceae    | 0.71  |
| OTU566  | Proteobacteria | unclassified_Rhodobacteraceae    | 0.61  |
| OTU528  | Proteobacteria | Aliiroseovarius                  | 0.60  |
| OTU1000 | Proteobacteria | unclassified_Rhodobacteraceae    | 0.55  |
| OTU109  | Proteobacteria | unclassified_Rhodobacteraceae    | 0.50  |
| OTU1240 | Proteobacteria | unclassified_Rhodobacteraceae    | 0.27  |
| OTU814  | Proteobacteria | Vibrio                           | 0.25  |
| OTU160  | Proteobacteria | unclassified_Rhodobacteraceae    | 0.23  |
| OTU1127 | Proteobacteria | Halioglobus                      | 0.22  |
| OTU1163 | Proteobacteria | unclassified_Alphaproteobacteria | 0.20  |
| OTU1159 | Proteobacteria | unclassified_Rhodobacteraceae    | 0.19  |
| OTU770  | Proteobacteria | unclassified_Rhodobacteraceae    | 0.19  |
| OTU1199 | Proteobacteria | unclassified_Rhodobacteraceae    | 0.19  |
| OTU640  | Proteobacteria | Halioglobus                      | 0.18  |
| OTU1185 | Proteobacteria | Haliea                           | 0.17  |
| OTU1129 | Proteobacteria | unclassified_Gammaproteobacteria | 0.16  |
| OTU408  | Proteobacteria | Sulfitobacter                    | 0.13  |
| OTU1194 | Proteobacteria | unclassified_Alphaproteobacteria | 0.12  |
| OTU1186 | Proteobacteria | unclassified_Oceanospirillales   | 0.11  |
| OTU253  | Proteobacteria | Paracoccus                       | 0.07  |
| OTU889  | Proteobacteria | unclassified_Rhodobacteraceae    | 0.06  |
| OTU637  | Bacteroidetes  | Prevotella                       | 4.12  |
| OTU790  | Bacteroidetes  | unclassified_Flavobacteriaceae   | 3.65  |
| OTU1133 | Bacteroidetes  | unclassified_Flavobacteriaceae   | 2.16  |
| OTU726  | Bacteroidetes  | unclassified_Flavobacteriaceae   | 0.86  |
| OTU1139 | Bacteroidetes  | unclassified_Flavobacteriaceae   | 0.86  |
| OTU1212 | Bacteroidetes  | unclassified_Flavobacteriaceae   | 0.54  |

---

|           |                 |                                  |       |
|-----------|-----------------|----------------------------------|-------|
| OTU1193   | Bacteroidetes   | Tenacibaculum                    | 0.52  |
| OTU1167   | Bacteroidetes   | unclassified_Porphyrimonadaceae  | 0.45  |
| OTU1238   | Bacteroidetes   | unclassified_Porphyrimonadaceae  | 0.40  |
| OTU571    | Bacteroidetes   | unclassified_Flavobacteriaceae   | 0.38  |
| OTU257    | Bacteroidetes   | unclassified_Porphyrimonadaceae  | 0.34  |
| OTU1145   | Bacteroidetes   | unclassified_Flavobacteriaceae   | 0.34  |
| OTU791    | Bacteroidetes   | unclassified_Flavobacteriaceae   | 0.12  |
| OTU1196   | Verrucomicrobia | Haloferula                       | 4.07  |
| OTU1187   | Verrucomicrobia | Haloferula                       | 2.58  |
| OTU245    | Verrucomicrobia | unclassified_Verrucomicrobiaceae | 0.06  |
| OTU423    | Actinobacteria  | Bifidobacterium                  | 1.07  |
| OTU1181   | Actinobacteria  | unclassified_Actinomycetales     | 0.08  |
| Core OTUs |                 |                                  | 83.90 |

27 # OTU ID marked with green color means that their abundance higher than 1% in at least 5  
 28 samples and they are core OTUs as well.

29

30

31

32 **Table S4. The alpha diversity (Shannon index) of shrimp gut microbiota in each group**  
 33 **on average.**

| Items                 | W1   | W2   | W3   | W4   | W5   | W6   | W7   | W8   |
|-----------------------|------|------|------|------|------|------|------|------|
| NC (Shannon index)    | 4.24 | 4.02 | 4.96 | 3.69 | 3.85 | 5.56 | 5.48 | 5.38 |
| KM (Shannon index)    | 4.16 | 3.46 | 3.99 | 4.55 | 5.16 | 2.92 | 4.57 | 5.41 |
| NC (observed species) | 243  | 224  | 295  | 240  | 280  | 302  | 343  | 326  |
| KM (observed species) | 244  | 218  | 261  | 299  | 383  | 239  | 349  | 339  |

34

35

36

37

38

39

40 **Table S5. Gut microbiota showed significantly diverged in weeks 6 and 7 between two**  
 41 **groups**

| Items       | Bray Curtis ( $P^a$ -value) | Weighted UniFrac ( $P^b$ -value) |
|-------------|-----------------------------|----------------------------------|
| NW1 VS. KW1 | 0.7196                      | 0.7315                           |



|             |            |            |
|-------------|------------|------------|
| NW2 VS. KW2 | 0.5353     | 0.5988     |
| NW3 VS. KW3 | 0.3248     | 0.4723     |
| NW4 VS. KW4 | 0.4706     | 0.7851     |
| NW5 VS. KW5 | 0.3248     | 0.5526     |
| NW6 VS. KW6 | 0.0008 *** | 0.0008 *** |
| NW7 VS. KW7 | 0.0088 **  | 0.0088 **  |
| NW8 VS. KW8 | 0.3270     | 0.5526     |

42 a: PERMANOVA test based on Bray-Curtis distance of samples followed by FDR adjustment.

43 b: PERMANOVA test based on weighted UniFrac distance of samples followed by FDR  
44 adjustment.

45

46 **Table S6 Compositions of the two feeds used in our study.**

| Composition(g/1000g)              | NC group | KM group | CP | H <sub>2</sub> O | CL  |
|-----------------------------------|----------|----------|----|------------------|-----|
| Fermented soybean meal            | 50       | 50       | 45 | 14               | 1.5 |
| Kelp powder                       | 20       | 20       | 14 | 10               | 1   |
| Peeled cardamom                   | 80       | 80       | 46 | 13               | 1.5 |
| Peanut bran                       | 100      | 70       | 50 | 7                | 5   |
| Spray dried pig blood cell powder | 10       | 10       | 92 | 6                | 1   |
| Steam carp fish meal              | 320      | 230      | 65 | 9                | 8   |
| High-gluten flour                 | 250      | 250      | 14 | 13               |     |
| Yeast                             | 25       | 25       | 45 | 8                | 2   |
| Sepia cream                       | 20       | 20       | 35 | 35               | 18  |
| Calcium dihydrogen phosphate      | 15       | 15       |    | 5                |     |
| Soybean phospholipid oil          | 15       | 15       |    | 0.5              | 99  |
| Fish oil                          | 25       | 25       |    | 0.5              | 99  |
| Chicken powder                    | 50       | 50       | 62 | 10               | 15  |
| Krill powder                      |          | 120      | 62 | 10               | 8   |
| Shrimp multidimensional           | 4        | 4        | 50 | 5                |     |
| Shrimp multi-mine                 | 4        | 4        |    | 5                |     |
| Choline chloride                  | 3.5      | 3.5      | 50 | 5                |     |
| VC ester                          | 1        | 1        | 50 | 5                |     |
| Salt                              | 1.5      | 1.5      |    | 2                |     |
| Chinese herbal medicine           | 6        | 6        | 50 | 10               | 1   |
| Total                             | 1000.0   | 1000.0   |    | 173              |     |

47

48

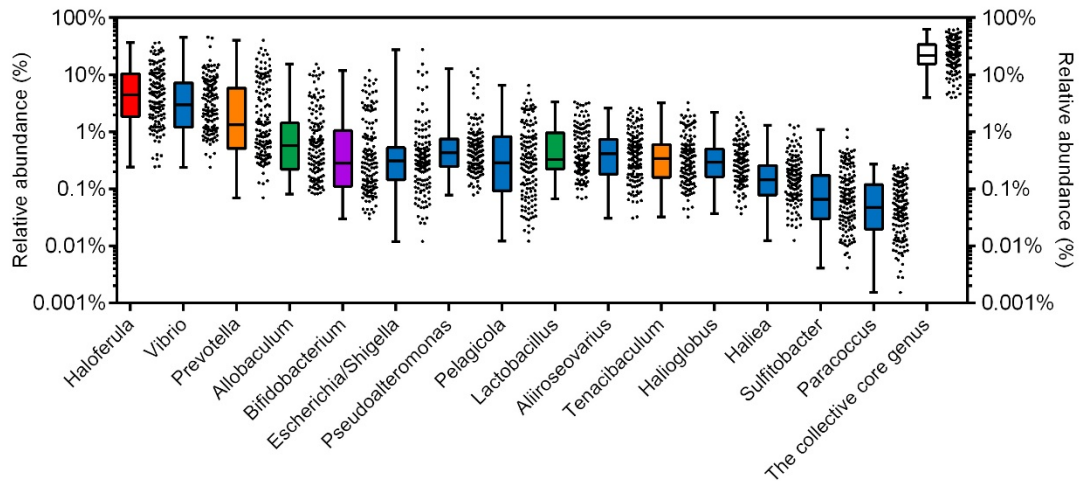

49

50 **Figure S1. The shrimps share a core gut microbiota composed of 15 bacterial genera.** Boxes  
 51 represent the interquartile range (IQR) between the first and third quartiles. The lines represent the  
 52 median. Whiskers denote the lowest and highest values within  $1.5 \times$  IQR from the first and third  
 53 quartiles, respectively. Different colors represent different phyla (blue: Proteobacteria, green:

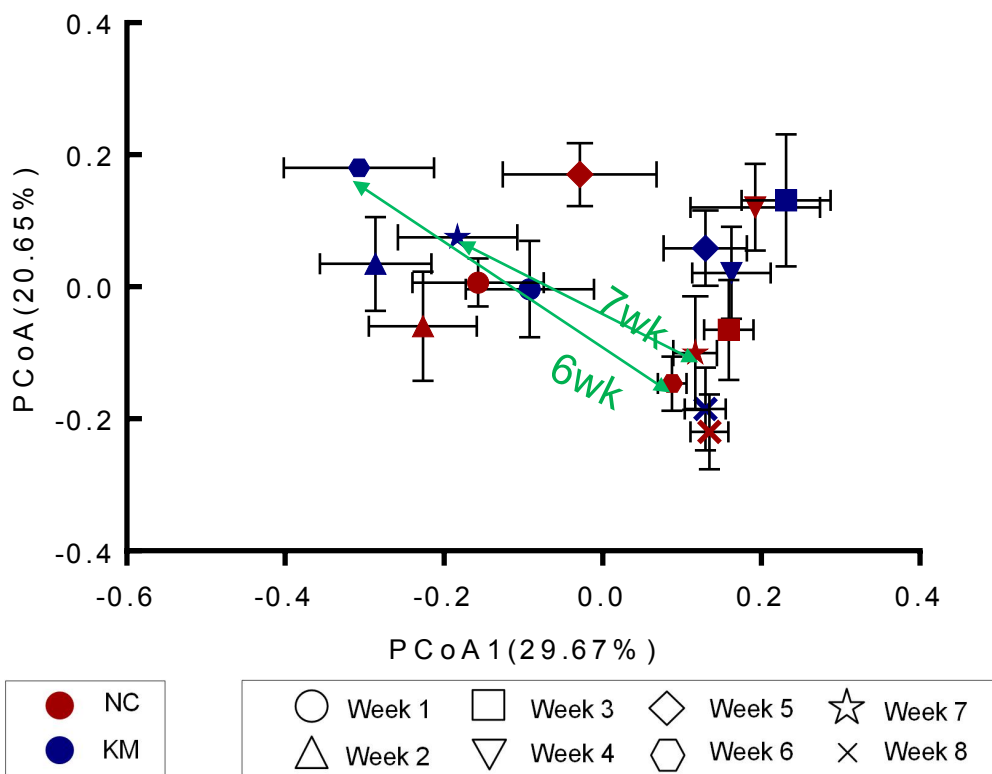

54 Firmicutes; orange: Bacteroidetes red: Verrucomicrobia; purple: Actinobacteria; ).

55

56 **Figure S2. PCoA plot based on Bray-Curtis distance.** Each point represents the mean principal  
 57 coordinate (PC) score of all shrimps in a group at one time point, and the error bar means the  
 58 s.e.m.

59
